# Supplementary material for: Systemic Antibiotics and Obesity: Analyses from a Population-Based Cohort
Source: MDPI journal article supplement (doi:10.3390/jcm10122601), 2021-06-12
Supplement: s1 [file s1]

## Supplementary Tables

**Supplementary Table 1.** Antibiotics code classification

| Code | classification                                                    |
|------|-------------------------------------------------------------------|
| 610  | Systemic antibiotics                                              |
| 611  | Mainly acting on gram-positive bacteria                           |
| 612  | Mainly acting on gram-negative bacteria                           |
| 613  | Mainly acting on mycobacterium species                            |
| 614  | Mainly acting on gram-positive bacteria,<br>Rickettsia, and virus |
| 615  | Mainly acting on gram-negative bacteria,<br>Rickettsia, and virus |
| 616  | Mainly acting on fungus and protozoa                              |
| 618  | Acting on gram-positive and gram-negative<br>bacteria             |
| 619  | Other antibiotics                                                 |

**Supplementary Table 2.** Results of logistic models for risk of obesity in according to the treatment duration of antibiotics against gram-positive and gram-negative bacteria.

| Antibiotics against gram-positive bacteria |                          |                         |                         |                         |
|--------------------------------------------|--------------------------|-------------------------|-------------------------|-------------------------|
| Antibiotics prescription days for 10 years |                          |                         |                         |                         |
|                                            | Non-users<br>(N=103,908) | Tertile 1<br>(N=60,725) | Tertile 2<br>(N=46,586) | Tertile 3<br>(N=55,228) |
| Obesity 1*, OR (95%CI)                     |                          |                         |                         |                         |
| Event                                      | 19,663                   | 11,829                  | 9,020                   | 11,368                  |
| Model 1**                                  | 1.00 (ref.)              | 1.036 (1.01;1.06)       | 1.03 (1.00;1.06)        | 1.11 (1.08;1.14)        |
| Model 2**                                  | 1.00 (ref.)              | 1.07 (1.04;1.09)        | 1.07 (1.04;1.10)        | 1.13 (1.11,1.17)        |
| Model 3**                                  | 1.00 (ref.)              | 1.06 (1.03;1.09)        | 1.06 (1.03,1.09)        | 1.09 (1.07,1.12)        |
| Model 4**                                  | 1.00 (ref.)              | 1.06 (1.03,1.09)        | 1.06 (1.03,1.09)        | 1.09 (1.06,1.13)        |
| Obesity 2*, OR (95%CI)                     |                          |                         |                         |                         |
| Event                                      | 39,902                   | 23,792                  | 17,872                  | 22,043                  |
| Model 1**                                  | 1.00 (ref.)              | 1.03 (1.01;1.06)        | 0.99 (0.98,1.02)        | 1.07 (1.04,1.09)        |
| Model 2**                                  | 1.00 (ref.)              | 1.07 (1.05;1.09)        | 1.05 (1.03;1.08)        | 1.11 (1.09,1.14)        |
| Model 3**                                  | 1.00 (ref.)              | 1.07 (1.04;1.09)        | 1.04 (1.01;1.06)        | 1.07 (1.05,1.09)        |
| Model 4**                                  | 1.00 (ref.)              | 1.07 (1.04;1.09)        | 1.04 (1.01,1.06)        | 1.07 (1.05,1.09)        |
| Obesity 3*, OR (95%CI)                     |                          |                         |                         |                         |
| Event                                      | 36,902                   | 21,879                  | 16,298                  | 19,811                  |
| Model 1**                                  | 1.00 (ref.)              | 1.02 (1.00,1.04)        | 0.98 (0.96;1.00)        | 1.02 (0.99;1.04)        |

|                                            |                        |                         |                         |                         |
|--------------------------------------------|------------------------|-------------------------|-------------------------|-------------------------|
| Model 2**                                  | 1.00 (ref.)            | 1.07 (1.04;1.09)        | 1.05 (1.02;1.07)        | 1.09 (1.07;1.12)        |
| Model 3**                                  | 1.00 (ref.)            | 1.06 (1.04;1.08)        | 1.03 (1.01;1.05)        | 1.06 (1.03;1.08)        |
| Model 4**                                  | 1.00 (ref.)            | 1.06 (1.04;1.08)        | 1.03 (1.01;1.05)        | 1.06 (1.03;1.08)        |
| Obesity 4*, OR (95%CI)                     |                        |                         |                         |                         |
| Event                                      | 22,663                 | 13,742                  | 10,594                  | 13,600                  |
| Model 1**                                  | 1.00 (ref.)            | 1.05 (1.02;1.07)        | 1.06 (1.03;1.08)        | 1.17 (1.14;1.20)        |
| Model 2**                                  | 1.00 (ref.)            | 1.07 (1.05;1.09)        | 1.08 (1.05;1.11)        | 1.15 (1.12;1.17)        |
| Model 3**                                  | 1.00 (ref.)            | 1.06 (1.04;1.09)        | 1.06 (1.03;1.09)        | 1.10 (1.08;1.13)        |
| Model 4**                                  | 1.00 (ref.)            | 1.06 (1.04;1.09)        | 1.06 (1.04;1.09)        | 1.11 (1.08;1.13)        |
| Antibiotics against gram-negative bacteria |                        |                         |                         |                         |
| Antibiotics prescription days for 10 years |                        |                         |                         |                         |
|                                            | Non-users<br>(N=6,933) | Tertile 1<br>(N=85,813) | Tertile 2<br>(N=86,537) | Tertile 3<br>(N=87,164) |
| Obesity 1*, OR (95%CI)                     |                        |                         |                         |                         |
| Event                                      | 1,299                  | 16,025                  | 16,515                  | 18,041                  |
| Model 1**                                  | 1.00 (ref.)            | 0.99 (0.94;1.06)        | 1.02 (0.96;1.09)        | 1.13 (1.06;1.21)        |
| Model 2**                                  | 1.00 (ref.)            | 1.07 (1.01;1.14)        | 1.15 (1.08;1.23)        | 1.29 (1.21;1.38)        |
| Model 3**                                  | 1.00 (ref.)            | 1.07 (0.99;1.14)        | 1.13 (1.06;1.21)        | 1.22 (1.15;1.31)        |
| Model 4**                                  | 1.00 (ref.)            | 1.07 (0.99;1.14)        | 1.13 (1.06;1.21)        | 1.23 (1.15;1.31)        |
| Obesity 2*, OR (95%CI)                     |                        |                         |                         |                         |
| Event                                      | 2,658                  | 32,757                  | 33,156                  | 35,038                  |

|                        |             |                  |                  |                  |
|------------------------|-------------|------------------|------------------|------------------|
| Model 1**              | 1.00 (ref.) | 0.99 (0.94;1.04) | 0.99 (0.95;1.05) | 1.08 (1.03;1.14) |
| Model 2**              | 1.00 (ref.) | 1.09 (1.03;1.14) | 1.16 (1.10;1.22) | 1.29 (1.22;1.36) |
| Model 3**              | 1.00 (ref.) | 1.08 (1.03;1.14) | 1.14 (1.08;1.20) | 1.23 (1.17;1.29) |
| Model 4**              | 1.00 (ref.) | 1.08 (1.03;1.14) | 1.14 (1.08;1.20) | 1.23 (1.17;1.29) |
| Obesity 3*, OR (95%CI) |             |                  |                  |                  |
| Event                  | 2,491       | 30,402           | 30,443           | 31,554           |
| Model 1**              | 1.00 (ref.) | 0.98 (0.93;1.03) | 0.97 (0.92;1.02) | 1.01 (0.96;1.07) |
| Model 2**              | 1.00 (ref.) | 1.07 (1.01;1.13) | 1.14 (1.08;1.20) | 1.25 (1.19;1.31) |
| Model 3**              | 1.00 (ref.) | 1.06 (1.01;1.12) | 1.12 (1.06;1.18) | 1.19 (1.13;1.26) |
| Model 4**              | 1.00 (ref.) | 1.06 (1.01;1.12) | 1.12 (1.06;1.18) | 1.19 (1.13;1.25) |
| Obesity 4*, OR (95%CI) |             |                  |                  |                  |
| Event                  | 1,466       | 18,380           | 19,228           | 21,525           |
| Model 1**              | 1.00 (ref.) | 1.02 (0.96;1.08) | 1.07 (1.00;1.13) | 1.22 (1.15;1.29) |
| Model 2**              | 1.00 (ref.) | 1.09 (1.03;1.16) | 1.17 (1.10;1.25) | 1.33 (1.25;1.41) |
| Model 3**              | 1.00 (ref.) | 1.08 (1.02;1.15) | 1.15 (1.08;1.23) | 1.26 (1.18;1.34) |
| Model 4**              | 1.00 (ref.) | 1.09 (1.02;1.15) | 1.16 (1.09;1.23) | 1.27 (1.19;1.35) |

\*Obesity 1: subjects who satisfied both BMI and WC criteria; \*Obesity 2: subjects who satisfied BMI or WC criteria; \*Obesity 3: subjects who satisfied only BMI criteria; \*Obesity 4: subjects who satisfied only WC criteria.

\*\*Model 1: non-adjusted; \*\*Model 2: adjusted for age and sex; \*\*Model 3: adjusted for factors in Model 2 and comorbidity such as DM, HTN, and dyslipidemia; \*\*Model 4: adjusted for factors in Model 3 and lifestyle factors such as drinking, smoking, and exercise.
